# Supplementary material for: Photo-induced hybrid nanopatterning of titanium dioxide via direct imprint lithography
Source: Royal Society of Chemistry journal article supplement (doi:10.1039/b921343k), 2010-01-01
Supplement: b921343k.pdf [file b921343k.pdf]

## Electronic Supplementary Information:

### Photo-induced hybrid nanopatterning of titanium dioxide via direct imprint lithography

Hyeong-Ho Park, Dae-Geun Choi, Xin Zhang, Sohee Jeon, Seong-Je Park, Soon-Won Lee, Sarah Kim, Ki-don Kim, Jun-Hyuk Choi, Jihye Lee, Dae Keun Yun, Ki Joong Lee, Hyung-Ho Park, Ross H. Hill and Jun-Ho Jeong\*

### X-ray diffraction spectra of UV-irradiated TiO<sub>2</sub> films:

A UV-irradiated film on a quartz substrate was investigated by XRD and found to be amorphous, as shown in Fig. S01. Three other similar UV-irradiated films on quartz substrates were annealed at 300, 400 and 500 °C for 1 h, respectively, and examined by XRD to investigate the effects of annealing on the film crystallinity. As shown in Fig. S01, the film annealed at 300 °C remained amorphous, whereas anatase TiO<sub>2</sub> crystalline phase appeared in the films annealed at 400 and 500 °C with a [101] preferred orientation. An annealing temperature of 400 °C is therefore sufficient to convert the UV-irradiated films from amorphous to anatase phase. The diffraction intensities showed a distribution similar to that of anatase TiO<sub>2</sub> powder,<sup>1</sup> and the quartz substrate was found not to influence the growth orientation of the TiO<sub>2</sub> films.

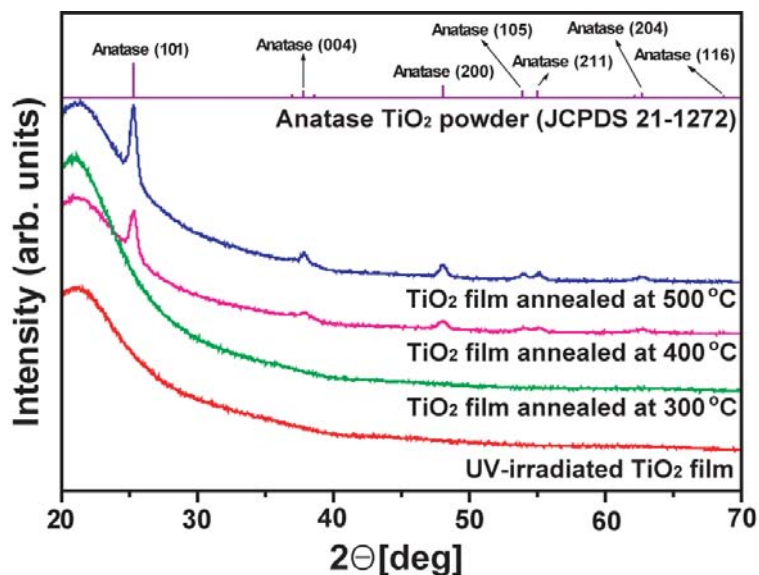

**Fig. S1** XRD spectra of the UV-irradiated TiO<sub>2</sub> film and the films annealed at 300, 400, and 500 °C for 1 h, respectively. The sharp line shows the major peak positions and intensities for anatase TiO<sub>2</sub> powder (Joint Committee on Powder Diffraction Standards (JCPDS) 21-1272).

### Reference

- 1 A. Jaroenworuluck, T. Panyathanmaporn, B. Soontornworajit, S. Supothina, *Surf. Interface Anal.*, 2006, **38**, 76
